# Supplementary material for: Causal Modeling of Cancer-Stromal Communication Identifies PAPPA as a Novel Stroma-Secreted Factor Activating NFκB Signaling in Hepatocellular Carcinoma
Source: PubMed Central journal article supplement (PMC4447342; doi:10.1371/journal.pcbi.1004293), 2015-05-28

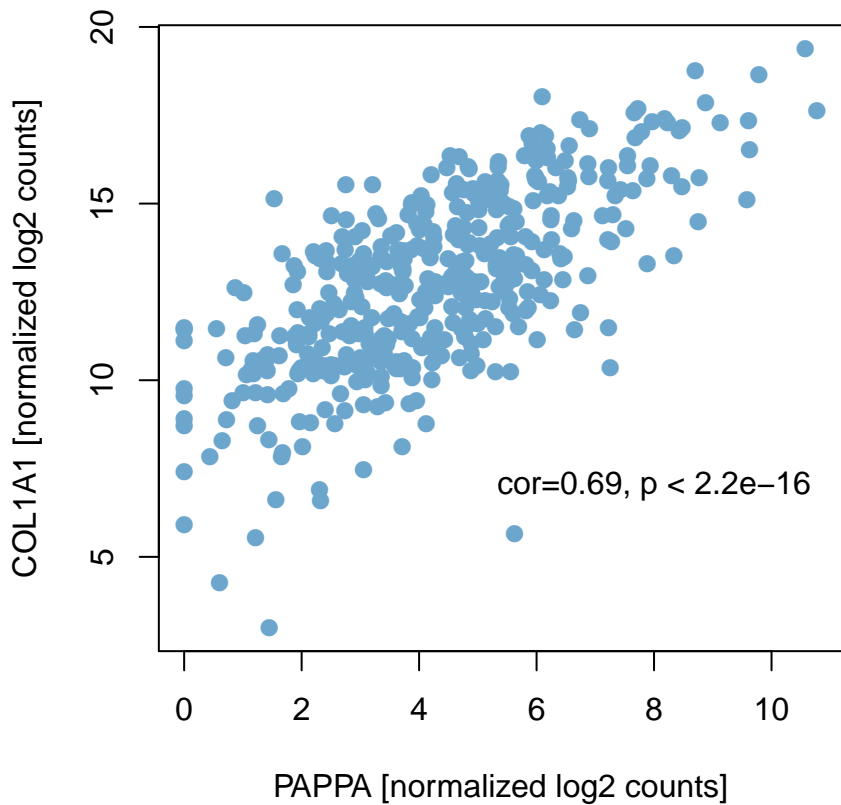

Supplement: pcbi.1004293.s009.pdf [file pcbi.1004293.s009.pdf]
